# Supplementary material for: The Relationship Between Depression and Anxiety Symptoms of Adult PWE and Caregivers in a Tertiary Center
Source: PubMed Central journal article supplement (PMC8959587; doi:10.3389/fneur.2022.766009), 2022-03-09
Supplement: Data_Sheet1.pdf [file Data_Sheet1.pdf]

## **Supplementary Material**

**Supplementary Table 1.** Clinical data of PWE according to caregivers' psychiatric groups.

| PWE data            | Caregivers with depression<br>N = 29<br>Median [range] or N (%) | Caregivers without depression<br>N = 81<br>Median [range] or N (%) | * <i>p</i> -value | Caregivers with anxiety<br>N = 31<br>Median [range] or N (%) | Caregivers without anxiety<br>N = 74<br>Median [range] or N (%) | * <i>p</i> -value | Caregivers with depression plus anxiety<br>N = 16<br>Median [range] or N (%) | Caregivers without depression plus anxiety<br>N = 84<br>Median [range] or N (%) | * <i>p</i> -value |
|---------------------|-----------------------------------------------------------------|--------------------------------------------------------------------|-------------------|--------------------------------------------------------------|-----------------------------------------------------------------|-------------------|------------------------------------------------------------------------------|---------------------------------------------------------------------------------|-------------------|
| BDI-II scores       | 22 [3-46]                                                       | 9 [0-41]                                                           | <b>&lt;0.001</b>  | 16 [0-36]                                                    | 9 [0-41]                                                        | <b>0.041</b>      | 22.5 [3-36]                                                                  | 8 [0-46]                                                                        | <b>0.007</b>      |
| BAI scores          | 18 [1-47]                                                       | 8 [0-50]                                                           | <b>0.015</b>      | 14 [0-39]                                                    | 8 [0-50]                                                        | 0.18              | 17 [1-39]                                                                    | 8.5 [0-50]                                                                      | 0.06              |
| LAEP scores         | 44.5 [21-68]                                                    | 37 [19-76]                                                         | <b>0.026</b>      | 43 [19-68]                                                   | 37 [19-76]                                                      | 0.22              | 45.5 [26-68]                                                                 | 36.5 [19-76]                                                                    | <b>0.038</b>      |
| Age                 | 29 [6-52]                                                       | 34 [3-67]                                                          | 0.28              | 29 [6-52]                                                    | 34 [3-67]                                                       | 0.09              | 27 [6-52]                                                                    | 34 [3-67]                                                                       | 0.06              |
| Epilepsy duration   | 15 [1-50]                                                       | 24 [2-56]                                                          | <b>0.015</b>      | 17 [1-50]                                                    | 24 [2-56]                                                       | 0.09              | 23 [2-56]                                                                    | 11.5 [1-50]                                                                     | <b>0.03</b>       |
| Type of epilepsy    |                                                                 |                                                                    | 0.67              |                                                              |                                                                 | 0.34              |                                                                              |                                                                                 | 0.3               |
| Focal               | 24 (82.8%)                                                      | 59 (74.7%)                                                         |                   | 26 (83.9%)                                                   | 54 (74%)                                                        |                   | 14 (87.5%)                                                                   | 62 (74.7%)                                                                      |                   |
| Genetic Generalized | 3 (10.3%)                                                       | 11 (13.9%)                                                         |                   | 4 (12.9%)                                                    | 10 (13.7%)                                                      |                   | 3 (12.5%)                                                                    | 11 (13.3%)                                                                      |                   |
| Unknown             | 2 (6.9%)                                                        | 9 (11.4%)                                                          |                   | 1 (3.2%)                                                     | 9 (12.3%)                                                       |                   | 0 (0%)                                                                       | 10 (12%)                                                                        |                   |
| Genetic related     |                                                                 |                                                                    | 0.75              |                                                              |                                                                 | 1                 |                                                                              |                                                                                 | 1                 |
| Yes                 | 22 (75.6%)                                                      | 57 (70.4%)                                                         |                   | 22 (71%)                                                     | 54 (73%)                                                        |                   | 11 (68.8%)                                                                   | 60 (72.3%)                                                                      |                   |
| No                  | 7 (24.1%)                                                       | 24 (29.6%)                                                         |                   | 9 (29%)                                                      | 20 (27%)                                                        |                   | 5 (31.3%)                                                                    | 23 (27.7%)                                                                      |                   |
| Seizure control     |                                                                 |                                                                    | 0.84              |                                                              |                                                                 | 0.56              |                                                                              |                                                                                 | 0.5               |
| Recurrent           | 21 (72.4%)                                                      | 52 (68.4%)                                                         |                   | 21 (72.4%)                                                   | 48 (67.6%)                                                      |                   | 13 (81.3%)                                                                   | 53 (66.3%)                                                                      |                   |
| Fluctuating         | 2 (6.9%)                                                        | 8 (10.5%)                                                          |                   | 4 (13.8%)                                                    | 7 (9.9%)                                                        |                   | 1 (6.3%)                                                                     | 9 (11.3%)                                                                       |                   |
| Seizure-free        | 6 (20.7%)                                                       | 16 (21.1%)                                                         |                   | 4 (13.8%)                                                    | 16 (22.5%)                                                      |                   | 2 (12.5%)                                                                    | 18 (22.5%)                                                                      |                   |

**Footnotes Supplementary Table 1:** PWE – People with Epilepsy; N – number of caregivers; BDI-II – Beck Depression Inventory-II; BAI – Beck Anxiety Inventory; LAEP – Liverpool Adverse Events Profile; \**p*-value for chi-square test of association between categorical variables and for Kruskal-Wallis test of comparison of medians for quantitative variables.

**Supplementary Table 2.** Sociodemographic and Clinical data (Epilepsy groups and Caregivers), according to epilepsy type.

|                                            | FE<br>N = 417<br>Median [range]<br>or N (%) | GGE<br>N = 74<br>Median[range]<br>or N (%) | Caregivers<br>N = 191<br>Median [range]<br>or N (%) | *p-value |
|--------------------------------------------|---------------------------------------------|--------------------------------------------|-----------------------------------------------------|----------|
| Median Age                                 | 43 [18-83]                                  | 33 [18-60]                                 | 47 [18-82]                                          | < 0.001  |
| Gender                                     |                                             |                                            |                                                     |          |
| Women                                      | 252 (60%)                                   | 48 (65%)                                   | 137 (72%)                                           | 0.026    |
| Men                                        | 165 (40%)                                   | 26 (35%)                                   | 54 (28%)                                            |          |
| Employment status                          |                                             |                                            |                                                     |          |
| Unemployment                               | 269 (65%)                                   | 38 (51%)                                   | 92 (48%)                                            | < 0.001  |
| Employment                                 | 148 (35%)                                   | 36 (49%)                                   | 99 (52%)                                            |          |
| Marital Status                             |                                             |                                            |                                                     |          |
| Married                                    | 189 (45%)                                   | 20 (27%)                                   | 111 (58%)                                           | < 0.001  |
| Non-Married                                | 228 (55%)                                   | 54 (73%)                                   | 80 (42%)                                            |          |
| Years of Education                         | 11 [0-18]                                   | 11 [0-18]                                  | 10 [0-18]                                           | 0.1      |
| Clinical depression                        |                                             |                                            |                                                     |          |
| N                                          | 372                                         | 69                                         | 174                                                 |          |
| Yes                                        | 161 (43%)                                   | 22 (32%)                                   | 56 (32%)                                            | 0.026    |
| No                                         | 211 (57%)                                   | 47 (68%)                                   | 118 (68%)                                           |          |
| BDI-II Score                               | 11 [0-57]                                   | 9 [0-49]                                   | 7 [0-56]                                            | 0.018    |
| Suicidal Ideation                          |                                             |                                            |                                                     |          |
| N                                          | 404                                         | 73                                         | 186                                                 |          |
| Yes                                        | 82 (20%)                                    | 8 (11%)                                    | 20 (11%)                                            | 0.006    |
| No                                         | 322 (80%)                                   | 65 (89%)                                   | 166 (89%)                                           |          |
| Clinical anxiety                           |                                             |                                            |                                                     |          |
| N                                          | 376                                         | 64                                         | 168                                                 |          |
| Yes                                        | 141 (38%)                                   | 23 (36%)                                   | 55 (33%)                                            | 0.56     |
| No                                         | 235 (62%)                                   | 41 (64%)                                   | 113 (67%)                                           |          |
| BAI Score                                  | 10 [0-58]                                   | 7 [0-50]                                   | 7 [0-51]                                            | 0.3      |
| Concurrent clinical depression and anxiety |                                             |                                            |                                                     |          |
| N                                          | 346                                         | 60                                         | 160                                                 |          |
| Yes                                        | 95 (28%)                                    | 14 (23%)                                   | 35 (22%)                                            | 0.38     |
| BDI-II score                               | 24 [14-57]                                  | 30 [14-49]                                 | 24 [14-56]                                          | 0.45     |
| BAI score                                  | 25 [14-56]                                  | 30 [17-50]                                 | 29 [15-51]                                          | 0.26     |
| ASD adverse events                         |                                             |                                            |                                                     |          |
| N                                          | 371                                         | 69                                         | NA                                                  |          |
| Yes                                        | 100 (27%)                                   | 17 (25%)                                   |                                                     | 0.8      |
| No                                         | 271 (73%)                                   | 52 (75%)                                   |                                                     |          |
| LAEP score                                 | 36 [19-76]                                  | 37 [19-68]                                 |                                                     | 0.75     |

**Footnotes Supplementary Table 2:** FE – Focal Epilepsy; GGE – Genetic Generalized Epilepsy; BDI-II – Beck Depression Inventory-II; BAI – Beck Anxiety Inventory; ASD – Antiseizure Drugs; LAEP – Liverpool Adverse Events Profile; \*p-value for chi-square test of association between categorical variables and for Kruskal-Wallis test of comparison of medians for quantitative variables.

**Supplementary Table 3. Clinical Data of PWE according to the seizure outcome.**

|                                            | Recurrent seizures<br>N = 332<br>Median [range]<br>or N (%) | Fluctuating<br>N = 78<br>Median [range]<br>or N (%) | Seizure-free<br>N = 133<br>Median [range]<br>or N (%) | *p-value |
|--------------------------------------------|-------------------------------------------------------------|-----------------------------------------------------|-------------------------------------------------------|----------|
| Median Age                                 | 41 [18-73]                                                  | 40 [18-70]                                          | 41 [18-83]                                            | 0.6      |
| Gender                                     |                                                             |                                                     |                                                       |          |
| Women                                      | 200 (60%)                                                   | 44 (56%)                                            | 82 (62%)                                              | 0.75     |
| Men                                        | 132 (40%)                                                   | 34 (44%)                                            | 51 (38%)                                              |          |
| Clinical depression                        |                                                             |                                                     |                                                       |          |
| N                                          | 295                                                         | 74                                                  | 124                                                   | 0.002    |
| Yes                                        | 140 (48%)                                                   | 28 (38%)                                            | 36 (29%)                                              |          |
| No                                         | 155 (52%)                                                   | 46 (62%)                                            | 88 (71%)                                              |          |
| BDI score                                  | 13 [0-57]                                                   | 11 [0-41]                                           | 6 [0-47]                                              | < 0.001  |
| Suicidal Ideation                          |                                                             |                                                     |                                                       |          |
| N                                          | 320                                                         | 77                                                  | 132                                                   | < 0.001  |
| Yes                                        | 81 (25%)                                                    | 6 (8%)                                              | 12 (9%)                                               |          |
| No                                         | 239 (75%)                                                   | 71 (92%)                                            | 120 (91%)                                             |          |
| Clinical anxiety                           |                                                             |                                                     |                                                       |          |
| N                                          | 292                                                         | 71                                                  | 125                                                   | < 0.001  |
| Yes                                        | 131 (45%)                                                   | 20 (28%)                                            | 31 (25%)                                              |          |
| No                                         | 161 (55%)                                                   | 51 (62%)                                            | 94 (75%)                                              |          |
| BAI Score                                  | 11 [0-58]                                                   | 8 [0-54]                                            | 5 [0-48]                                              | < 0.001  |
| Concurrent clinical depression and anxiety |                                                             |                                                     |                                                       |          |
| N                                          | 270                                                         | 67                                                  | 116                                                   | 0.01     |
| Yes                                        | 87 (32%)                                                    | 15 (22%)                                            | 21 (18%)                                              |          |
| BDI-II score                               | 26 [14-57]                                                  | 21 [14-41]                                          | 23 [14-47]                                            |          |
| BAI score                                  | 26 [14-56]                                                  | 25 [14-54]                                          | 23 [14-48]                                            | 0.35     |
| ASD adverse events                         |                                                             |                                                     |                                                       |          |
| N                                          | 291                                                         | 73                                                  | 125                                                   | < 0.001  |
| Yes                                        | 98 (34%)                                                    | 15 (20%)                                            | 20 (16%)                                              |          |
| No                                         | 193 (66%)                                                   | 58 (80%)                                            | 105 (84%)                                             |          |
| LAEP score                                 | 39 [19-76]                                                  | 34 [19-73]                                          | 33 [19-73]                                            | < 0.001  |

**Footnotes Supplementary Table 3:** BDI-II – Beck Depression Inventory-II; BAI – Beck Anxiety Inventory; ASD – Antiseizure drugs; LAEP – Liverpool Adverse Events Profile; \*p-value for chi-square test of association between categorical variables and for Kruskal-Wallis test of comparison of medians for quantitative variables.

**Supplementary Table 4.** Variables in the equation for Clinical Depressive Symptoms in PWE.

| Factors                      | B      | S.E   | Wald   | df | Sig.    | Exp.(B) | C.I for Exp(B) |        |
|------------------------------|--------|-------|--------|----|---------|---------|----------------|--------|
| Age                          | 0.001  | 0.009 | 0.009  | 1  | 0.924   | 1.001   | 0.983          | 1.019  |
| Women                        | 0.505  | 0.236 | 4.579  | 1  | 0.032   | 1.657   | 1.043          | 2.632  |
| Education<br>(In Years)      | 0.053  | 0.035 | 2.316  | 1  | 0.128   | 1.054   | 0.985          | 1.128  |
| Unemployment                 | 0.294  | 0.239 | 1.508  | 1  | 0.219   | 1.342   | 0.839          | 2.146  |
| Type of Epilepsy             |        |       | 4.411  | 2  | 0.110   |         |                |        |
| Focal                        | 0.761  | 0.364 | 4.359  | 1  | 0.037   | 2.139   | 1.048          | 4.369  |
| Unknown                      | 0.732  | 0.476 | 2.368  | 1  | 0.124   | 2.079   | 0.818          | 5.282  |
| Seizure control              |        |       | 2.566  | 2  | 0.277   |         |                |        |
| Recurrent seizures           | 0.434  | 0.276 | 2.459  | 1  | 0.117   | 1.543   | 0.897          | 2.653  |
| Fluctuating<br>seizures      | 0.408  | 0.373 | 1.199  | 1  | 0.274   | 1.504   | 0.724          | 3.121  |
| Clinical anxiety<br>symptoms | 2.082  | 0.234 | 79.076 | 1  | < 0.001 | 8.018   | 5.067          | 12.685 |
| Constant                     | -3.199 | 0.726 | 19.415 | 1  | < 0.001 | 0.041   |                |        |

**Footnotes Supplementary Table 4:** PWE – People with Epilepsy; B – Beta; S.E – Standard Error; df – Degrees of Freedom; Exp(B) – Exponential Beta; C.I – Confidence Interval

**Supplementary Table 5.** Variables in the equation for Suicidal Ideation in PWE.

| Factors                   | B      | S.E   | Wald   | df | Sig.    | Exp.(B) | C.I for Exp (B) |       |
|---------------------------|--------|-------|--------|----|---------|---------|-----------------|-------|
| Age                       | -0.025 | 0.010 | 6.197  | 1  | 0.013   | 0.975   | 0.956           | 0.995 |
| Women                     | 0.244  | 0.278 | 0.770  | 1  | 0.380   | 1.276   | 0.740           | 2.200 |
| Unemployment              | 0.463  | 0.290 | 2.546  | 1  | 0.111   | 1.589   | 0.900           | 2.808 |
| Type of Epilepsy          |        |       | 5.927  | 2  | 0.52    |         |                 |       |
| Focal                     | 1.151  | 0.492 | 5.48   | 1  | 0.019   | 3.161   | 1.206           | 8.286 |
| Unknown                   | 0.748  | 0.624 | 1.437  | 1  | 0.231   | 2.113   | 0.622           | 7.179 |
| Seizure control           |        |       | 10.651 | 2  | 0.005   |         |                 |       |
| Recurrent seizures        | 0.944  | 0.365 | 6.679  | 1  | 0.010   | 2.570   | 1.256           | 5.258 |
| Fluctuating seizures      | -0.220 | 0.587 | 0.140  | 1  | 0.708   | 0.803   | 0.254           | 2.536 |
| Clinical anxiety symptoms | 1.655  | 0.274 | 36.367 | 1  | < 0.001 | 5.233   | 3.056           | 8.961 |
| Constant                  | -3.394 | 0.690 | 24.198 | 1  | < 0.001 | 0.034   |                 |       |

**Footnotes Supplementary Table 5:** PWE – People with Epilepsy; B – Beta; S.E – Standard Error; df – Degrees of Freedom; Exp(B) – Exponential Beta; C.I – Confidence Interval

**Supplementary Table 6.** Variables in the equation for Clinical Anxiety Symptoms in PWE.

| Factors                      | B      | S.E   | Wald    | df | Sig.    | Exp.(B) | C.I for Exp (B) |        |
|------------------------------|--------|-------|---------|----|---------|---------|-----------------|--------|
| Age                          | 0.006  | 0.009 | 0.439   | 1  | 0.507   | 1.006   | 0.988           | 1.025  |
| Women                        | 0.727  | 0.248 | 8.606   | 1  | 0.003   | 2.068   | 1.273           | 3.361  |
| Education (In Years)         | -0.052 | 0.035 | 2.174   | 1  | 0.140   | 0.949   | 0.886           | 1.017  |
| Unemployment                 | 0.407  | 0.251 | 2.642   | 1  | 0.104   | 1.503   | 0.920           | 2.455  |
| Seizure control              |        |       | 7.682   | 2  | 0.021   |         |                 |        |
| Recurrent seizures           | 0.751  | 0.288 | 6.788   | 1  | 0.009   | 2.120   | 1.205           | 3.730  |
| Fluctuating seizures         | 0.214  | 0.398 | 0.288   | 1  | 0.591   | 1.238   | 0.567           | 2.702  |
| Type of epilepsy             |        |       | 1.962   | 2  | 0.375   |         |                 |        |
| Focal Epilepsy               | -0.401 | 0.364 | 1.214   | 1  | 0.271   | 0.670   | 0.328           | 1.366  |
| Unknown Epilepsy             | -0.007 | 0.483 | < 0.001 | 1  | 0.988   | 0.993   | 0.385           | 2.558  |
| Clinical Depressive symptoms | 2.084  | 0.234 | 79.039  | 1  | < 0.001 | 8.034   | 5.075           | 12.718 |
| Constant                     | -2.172 | 0.711 | 9.338   | 1  | 0.002   | 0.114   |                 |        |

**Footnotes Supplementary Table 6:** PWE – People with Epilepsy; B – Beta; S.E – Standard Error; df – Degrees of Freedom; Exp(B) – Exponential Beta; C.I – Confidence Interval

**Supplementary Table 7.** Variables in the equation for combined Clinical Anxiety and Depression Symptoms in PWE.

| Factors                                  | B      | S.E   | Wald    | df | Sig.  | Exp.(B) | C.I for Exp (B) |        |
|------------------------------------------|--------|-------|---------|----|-------|---------|-----------------|--------|
| LAEP                                     | 2.983  | 0.291 | 104.904 | 1  | 0.000 | 19.755  | 11.162          | 34.964 |
| Seizure control                          |        |       | 1.237   | 2  | 0.539 |         |                 |        |
| Recurrent seizures                       | 0.341  | 0.353 | 0.931   | 1  | 0.335 | 1.406   | 0.704           | 2.811  |
| Fluctuating seizures                     | 0.000  | 0.510 | 0.000   | 1  | 1.000 | 1.000   | 0.368           | 2.718  |
| Type of epilepsy                         |        |       | 0.608   | 2  | 0.738 |         |                 |        |
| Focal Epilepsy                           | 0.280  | 0.460 | 0.369   | 1  | 0.543 | 1.323   | 0.537           | 3.260  |
| Unknown Epilepsy                         | 0.457  | 0.594 | 0.593   | 1  | 0.441 | 1.579   | 0.493           | 5.054  |
| Unemployment                             | 0.229  | 0.308 | 0.551   | 1  | 0.458 | 1.257   | 0.687           | 2.300  |
| Women                                    | 0.659  | 0.316 | 4.353   | 1  | 0.037 | 1.933   | 1.041           | 3.590  |
| Familial history of epilepsy             | 0.165  | 0.301 | 0.298   | 1  | 0.585 | 1.179   | 0.653           | 2.129  |
| Familial history of psychiatric symptoms | 0.298  | 0.351 | 0.719   | 1  | 0.396 | 1.347   | 0.677           | 2.678  |
| Constant                                 | -3.316 | 0.596 | 30.914  | 1  | 0.000 | 0.036   |                 |        |

**Footnotes Supplementary Table 7:** PWE – People with Epilepsy; LAEP – Liverpool Adverse Events Profile; B – Beta; S.E – Standard Error; df – Degrees of Freedom; Exp(B) – Exponential Beta; C.I – Confidence Interval



**Supplementary Table 8.** Variables in the equation for Clinical Depressive Symptoms in Caregivers.

| Factors                                | B      | S.E   | Wald   | df | Sig.    | Exp.(B) | C.I for Exp (B) |
|----------------------------------------|--------|-------|--------|----|---------|---------|-----------------|
| Age                                    | 0.002  | 0.009 | 0.039  | 1  | 0.844   | 1.002   | 0.985 1.019     |
| Women                                  | 0.489  | 0.229 | 4.547  | 1  | 0.033   | 1.630   | 1.040 2.555     |
| Marital <i>Status</i><br>(Non-married) | 0.072  | 0.230 | 0.099  | 1  | 0.753   | 1.075   | 0.685 1.687     |
| Clinical anxiety<br>symptoms           | 2.102  | 0.225 | 86.963 | 1  | < 0.001 | 8.181   | 5.260 12.724    |
| Constant                               | -1.623 | 0.431 | 14.163 | 1  | < 0.001 | 0.197   |                 |

**Footnotes Supplementary Table 8:** B – Beta; S.E – Standard Error; df – Degrees of Freedom; Exp(B) – Exponential Beta; C.I – Confidence Interval

**Supplementary Table 9.** Variables in the equation for Anxiety Clinical Symptoms in Caregivers.

| Factors                         | B      | S.E   | Wald   | df | Sig.    | Exp.(B) | C.I for Exp (B) |        |
|---------------------------------|--------|-------|--------|----|---------|---------|-----------------|--------|
| Age                             | 0.006  | 0.009 | 0.391  | 1  | 0.532   | 1.006   | 0.988           | 1.024  |
| Women                           | 0.693  | 0.240 | 8.327  | 1  | 0.004   | 1.999   | 1.249           | 3.201  |
| Education<br>(In Years)         | -0.066 | 0.34  | 3.748  | 1  | 0.053   | 0.936   | 0.875           | 1.001  |
| Marital Status<br>(Non-married) | 0.502  | 0.238 | 4.448  | 1  | 0.035   | 1.652   | 1.036           | 2.635  |
| Clinical Depressive<br>symptoms | 2.127  | 0.228 | 87.281 | 1  | < 0.001 | 8.389   | 5.369           | 13.107 |
| Constant                        | -1.867 | 0.622 | 9.023  | 1  | 0.003   | 0.155   |                 |        |

**Footnotes Supplementary Table 9:** B – Beta; S.E – Standard Error; df – Degrees of Freedom; Exp(B) – Exponential Beta; C.I – Confidence Interval
